# Supplementary material
Source: publisher site journal article supplement (https://www.dovepress.com/article/455108)
Supplement: Supplementary file 1 [file get_supplementary_file.php]

## **Supplementary Table** 1. Baseline characteristics of the study participants according to age tertiles.

|  | Overall | Age(years) | | | *P*-value | statistic |
| --- | --- | --- | --- | --- | --- | --- |
| Q1 (18-53) | Q2 (54-68) | Q3 (69-80) |
| No. | 520 | 162 | 167 | 191 |  |  |
| Age | 64.0 (49.0, 73.0) | 41.0 (28.2, 48.0) | 63.0 (57.0, 65.5) | 75.0 (71.5, 79.0) | < 0.001 | 460.785 |
| Gender (Female) | 120 (23.1) | 54 (33.3) | 27 (16.2) | 39 (20.4) | < 0.001 | 14.851 |
| Race |  |  |  |  | < 0.001 | 38.79 |
| Han Chinese | 419 (80.6) | 105 (64.8) | 142 (85) | 172 (90.1) |  |  |
| othera | 101 (19.4) | 57 (35.2) | 25 (15) | 19 (9.9) |  |  |
| Smoking | 291 (56.0) | 70 (43.2) | 116 (69.5) | 105 (55) | < 0.001 | 23.113 |
| Alcohol abuse | 195 (37.5) | 43 (26.5) | 84 (50.3) | 68 (35.6) | < 0.001 | 20.265 |
| Immunosuppressive therapyb | 34 ( 6.5) | 8 (4.9) | 14 (8.4) | 12 (6.3) | 0.443 | 1.629 |
| BMI | 19.0 (18.3, 21.3) | 19.3 (18.5, 22.5) | 19.1 (18.4, 20.4) | 19.0 (18.2, 21.0) | 0.149 | 3.808 |
| Drug resistant tuberculosis | 86 (16.5) | 47 (29) | 20 (12) | 19 (9.9) | < 0.001 | 26.791 |
| **Severity of illness** |  |  |  |  |  |  |
| APACHE II score | 17.0 (13.0, 21.0) | 15.0 (12.0, 20.0) | 17.0 (13.0, 21.0) | 18.0 (15.0, 23.0) | < 0.001 | 22.538 |
| SOFA score | 4.0 (3.0, 6.0) | 4.0 (3.0, 6.0) | 4.0 (3.0, 6.0) | 4.0 (3.0, 6.0) | 0.208 | 3.136 |
| **Main site of infection** |  |  |  |  |  |  |
| Abdominal infection | 28 ( 5.4) | 7 (4.3) | 8 (4.8) | 13 (6.8) | 0.54 | 1.233 |
| Urinary tract infection | 2 ( 0.4) | 0 (0) | 1 (0.6) | 1 (0.5) | 1 | Fisher |
| **ain sites of tuberculosis infection** |  |  |  |  |  |  |
| Pulmonary tuberculosis | 480 (92.3) | 152 (93.8) | 152 (91) | 176 (92.1) | 0.63 | 0.925 |
| TBM | 46 ( 8.8) | 17 (10.5) | 13 (7.8) | 16 (8.4) | 0.66 | 0.831 |
| Abdominal tuberculosis | 59 (11.3) | 19 (11.7) | 20 (12) | 20 (10.5) | 0.889 | 0.235 |
| Urinary system tuberculosis | 11 ( 2.1) | 5 (3.1) | 3 (1.8) | 3 (1.6) | 0.604 | Fisher |
| Tuberculosis in other parts of the bodyc | 28 ( 5.4) | 8 (4.9) | 14 (8.4) | 6 (3.1) | 0.086 | 4.897 |
| **Comorbidities** |  |  |  |  |  |  |
| Hypertension | 113 (21.7) | 7 (4.3) | 31 (18.6) | 75 (39.3) | < 0.001 | 64.388 |
| Diabetes | 102 (19.6) | 20 (12.3) | 40 (24) | 42 (22) | 0.017 | 8.104 |
| COPD | 109 (21.0) | 6 (3.7) | 28 (16.8) | 75 (39.3) | < 0.001 | 69.527 |
| CKD | 33 ( 6.3) | 3 (1.9) | 13 (7.8) | 17 (8.9) | 0.017 | 8.184 |
| Chronic liver disease | 29 ( 5.6) | 7 (4.3) | 19 (11.4) | 3 (1.6) | < 0.001 | 16.976 |
| SLE | 7 ( 1.3) | 3 (1.9) | 1 (0.6) | 3 (1.6) | 0.632 | Fisher |
| RA | 12 ( 2.3) | 1 (0.6) | 5 (3) | 6 (3.1) | 0.222 | Fisher |
| Pneumothorax | 31 ( 6.0) | 15 (9.3) | 8 (4.8) | 8 (4.2) | 0.099 | 4.622 |
| **Vital signs** |  |  |  |  |  |  |
| Temperature | 36.8 (36.5, 37.5) | 36.8 (36.5, 37.8) | 36.9 (36.5, 37.8) | 36.8 (36.5, 37.2) | 0.334 | 2.191 |
| Heart rate | 115.0 (100.0, 130.0) | 125.5 (110.2, 138.0) | 115.0 (96.0, 130.0) | 110.0 (98.0, 122.0) | < 0.001 | 39.222 |
| Respiratory rate | 32.0 (30.0, 35.0) | 34.5 (31.0, 40.0) | 32.0 (30.0, 35.0) | 32.0 (30.0, 34.0) | < 0.001 | 29.867 |
| MAP | 91.5 (78.0, 102.0) | 90.0 (77.0, 101.0) | 90.0 (78.0, 103.0) | 94.0 (80.0, 102.0) | 0.330 | 2.217 |
| **Laboratory test indicators** |  |  |  |  |  |  |
| WBC | 8.4 (6.0, 11.7) | 9.2 (6.3, 13.0) | 7.9 (5.7, 10.9) | 8.1 (6.1, 11.6) | 0.030 | 7.006 |
| RBC | 3.9 (3.3, 4.5) | 4.2 (3.5, 4.7) | 3.7 (3.2, 4.4) | 3.8 (3.1, 4.3) | < 0.001 | 14.059 |
| HGB | 108.0 (91.0, 125.0) | 110.0 (92.2, 127.8) | 106.0 (91.0, 123.0) | 106.0 (86.5, 125.0) | 0.207 | 3.153 |
| PLT | 201.0 (124.5, 281.0) | 229.0 (142.0, 306.2) | 182.0 (109.5, 271.0) | 199.0 (126.5, 267.0) | 0.018 | 8.051 |
| PCT | 0.5 (0.2, 1.5) | 0.6 (0.2, 2.2) | 0.5 (0.2, 1.3) | 0.4 (0.1, 1.2) | 0.367 | 2.002 |
| CRP | 89.4 (51.0, 137.0) | 84.2 (48.1, 126.0) | 94.2 (52.8, 138.2) | 91.5 (52.0, 146.4) | 0.380 | 1.936 |
| Lactate | 2.0 (1.5, 2.8) | 2.1 (1.5, 3.0) | 2.1 (1.5, 3.2) | 1.9 (1.5, 2.5) | 0.170 | 3.55 |
| **Interventions** |  |  |  |  |  |  |
| Invasive mechanical ventilation use | 107 (20.6) | 42 (25.9) | 30 (18) | 35 (18.3) | 0.127 | 4.127 |
| Vasopressor use | 132 (25.4) | 46 (28.4) | 37 (22.2) | 49 (25.7) | 0.427 | 1.702 |
| **Outcome** |  |  |  |  |  |  |
| 28day loss | 19.5 (7.0, 28.0) | 28.0 (9.0, 28.0) | 22.0 (8.0, 28.0) | 14.0 (5.0, 28.0) | 0.008 | 9.683 |
| 28-day mortality (Death) | 241 (46.3) | 67 (41.4) | 63 (37.7) | 111 (58.1) | < 0.001 | 17.252 |
| Values are presented as median (interquartile range, IQR) for continuous variables of non-normal distribution and number (percentage) for categorical variables.  a:Including 98 Tibetans and 3 Yi ethnic groups;  b:Take immunosuppressants for more than 2 weeks before staying in ICU;  C:There were 17 cases of bone tuberculosis, 6 cases of laryngeal tuberculosis, 3 cases of skin tuberculosis (1 case with bone tuberculosis) and 3 cases of genital tuberculosis; | | | | | | |

**Supplementary Table 2. The change in effect estimate between covariates and mortality**

| Term1 | coeff1 | Change.percentage1 | Term2 | coeff2 | Change.percentage2 | VIF | colinearity | select.VIF |
| --- | --- | --- | --- | --- | --- | --- | --- | --- |
| Crude | 0.02 | Ref. | Full | 0.03 | Ref. | 1.767 | 0 | Ref. |
| Gender | 0.02 | 3.4 | Gender | 0.03 | -0.6 | 1.607 | 0 | No |
| Race | 0.02 | -4.5 | Race | 0.03 | -3.6 | 1.478 | 0 | No |
| Smoking | 0.02 | -0.7 | Smoking | 0.03 | 0.2 | 2.183 | 0 | No |
| Alcohol abuse | 0.02 | 0.9 | Alcohol abuse | 0.03 | 0.5 | 1.785 | 0 | No |
| Immunosuppressive therapy | 0.02 | -0.4 | Immunosuppressive therapy | 0.03 | -1.8 | 1.613 | 0 | No |
| **BMI** | **0.02** | **-12.9** | **BMI** | **0.03** | **21.2** | **1.123** | **0** | **Yes** |
| Abdominal infection | 0.02 | -2 | Abdominal infection | 0.03 | -0.5 | 1.218 | 0 | No |
| Urinary tract infection | 0.02 | -0.8 | Urinary tract infection | 0.03 | 2.7 | 1 | 0 | No |
| Drug resistant tuberculosis | 0.02 | 4.9 | Drug resistant tuberculosis | 0.03 | -7.1 | 1.152 | 0 | No |
| Pulmonary tuberculosis | 0.02 | 0 | Pulmonary tuberculosis | 0.03 | -1.3 | 1.648 | 0 | No |
| TBM | 0.02 | 1.1 | TBM | 0.03 | -1.1 | 1.321 | 0 | No |
| Abdominal tuberculosis | 0.02 | 1.8 | Abdominal tuberculosis | 0.03 | -0.6 | 1.495 | 0 | No |
| Urinary system tuberculosis | 0.02 | 1.5 | Urinary system tuberculosis | 0.03 | 0.4 | 1.182 | 0 | No |
| Tuberculosis.in.other.parts.of.the.body | 0.02 | 0.6 | Tuberculosis.in.other.parts.of.the.body | 0.03 | 0.6 | 1.237 | 0 | No |
| **Hypertension** | **0.01** | **-25.6** | **Hypertension** | **0.03** | **15.8** | **1.323** | **0** | **Yes** |
| Diabetes | 0.02 | -8.8 | Diabetes | 0.03 | 0.7 | 1.204 | 0 | No |
| **COPD** | **0.02** | **12.8** | **COPD** | **0.03** | **-3.7** | **1.32** | **0** | **Yes** |
| CKD | 0.02 | -5.8 | CKD | 0.03 | 0.6 | 1.217 | 0 | No |
| Chronic liver disease | 0.02 | -1.2 | Chronic liver disease | 0.03 | 2.5 | 1.165 | 0 | No |
| SLE | 0.02 | 0.2 | SLE | 0.03 | 0.1 | 1.168 | 0 | No |
| RA | 0.02 | -1.2 | RA | 0.03 | -1.5 | 1.587 | 0 | No |
| Pneumothorax | 0.02 | 2.9 | Pneumothorax | 0.03 | -1 | 1.087 | 0 | No |
| Temperature | 0.02 | -8.4 | Temperature | 0.03 | 4.4 | 1.255 | 0 | No |
| **Heart rate** | **0.02** | **29.3** | **Heart rate** | **0.02** | **-28.8** | **1.659** | **0** | **Yes** |
| Respiratory rate | 0.02 | -2.9 | Respiratory rate | 0.03 | 0.8 | 1.221 | 0 | No |
| MAP | 0.02 | 5.8 | MAP | 0.03 | -1.9 | 1.483 | 0 | No |
| WBC | 0.02 | -0.2 | WBC | 0.03 | -0.5 | 1.265 | 0 | No |
| RBC | 0.02 | 1 | RBC | 0.03 | -0.2 | 6.205 | 1 | Pending |
| HGB | 0.02 | -2.6 | HGB | 0.03 | -0.3 | 6.346 | 1 | Pending |
| PLT | 0.02 | -8.9 | PLT | 0.03 | 7.8 | 1.292 | 0 | No |
| PCT | 0.02 | 8.5 | PCT | 0.03 | -1.1 | 1.111 | 0 | No |
| CRP | 0.02 | -1.6 | CRP | 0.03 | -0.3 | 1.2 | 0 | No |
| Lactate | 0.02 | 5.5 | Lactate | 0.03 | 0 | 1.284 | 0 | No |
| **Invasive mechanical ventilation use** | **0.03** | **44.9** | **Invasive mechanical ventilation use** | **0.03** | **-6.7** | **1.746** | **0** | **Yes** |
| **Vasopressor use** | **0.03** | **39.6** | **Vasopressor use** | **0.03** | **5.5** | **1.81** | **0** | **Yes** |
| VIF, variance inflation factor | | | | | | | | |

**Supplementary Table 3. Univariate Cox model with all covariates for 28-day all-cause mortality**

| Item | HR(95%CI) | P(Wald's test) |
| --- | --- | --- |
| **Age (cont. var.)** | **1.02 (1.01,1.02)** | **< 0.001** |
| Gender: Man vs Female | 1.04 (0.77,1.4) | 0.822 |
| Race: Other race vs Han Chinese | 0.79 (0.56,1.11) | 0.175 |
| Smoking: Yes vs No | 1.05 (0.82,1.36) | 0.684 |
| Alcohol abuse: Yes vs No | 1.03 (0.8,1.34) | 0.814 |
| **Immunosuppressive use: Yes vs No** | **2.06 (1.36,3.13)** | **< 0.001** |
| **BMI (cont. var.)** | **0.81 (0.76,0.87)** | **< 0.001** |
| **Abdominal infection: Yes vs No** | **1.86 (1.16,2.97)** | **0.01** |
| **Urinary tract infection: Yes vs No** | **7.1 (1.75,28.71)** | **0.006** |
| Drug resistant tuberculosis: Yes vs No | 0.88 (0.63,1.25) | 0.481 |
| Pulmonary tuberculosis: Yes vs No | 0.96 (0.6,1.54) | 0.868 |
| TBM: Yes vs No | 1.11 (0.72,1.7) | 0.644 |
| Abdominal tuberculosis: Yes vs No | 1.38 (0.96,2) | 0.083 |
| Urinary system tuberculosis: Yes vs No | 1.17 (0.52,2.63) | 0.702 |
| Tuberculosis.in.other.parts.of.the.body: Yes vs No | 1.11 (0.65,1.91) | 0.701 |
| **Hypertension: Yes vs No** | **1.65 (1.25,2.18)** | **< 0.001** |
| **Diabetes: Yes vs No** | **1.5 (1.12,2.01)** | **0.006** |
| COPD: Yes vs No | 1.01 (0.74,1.38) | 0.945 |
| **CKD: Yes vs No** | **1.89 (1.22,2.92)** | **0.005** |
| Chronic liver disease: Yes vs No | 0.5 (0.25,1.01) | 0.053 |
| SLE: Yes vs No | 1.23 (0.46,3.3) | 0.685 |
| RA: Yes vs No | 1.51 (0.71,3.21) | 0.279 |
| Pneumothorax: Yes vs No | 1.03 (0.62,1.71) | 0.916 |
| **Temperature (cont. var.)** | **0.79 (0.67,0.93)** | **0.005** |
| **Heart rate (cont. var.)** | **1.0058 (1.0004,1.0112)** | **0.035** |
| Respiratory rate (cont. var.) | 0.99 (0.97,1.01) | 0.21 |
| **MAP (cont. var.)** | **0.9914 (0.9839,0.999)** | **0.026** |
| WBC (cont. var.) | 0.9956 (0.9708,1.0211) | 0.733 |
| RBC (cont. var.) | 1.0044 (0.9988,1.01) | 0.128 |
| **HGB (cont. var.)** | **0.9928 (0.9879,0.9978)** | **0.005** |
| **PLT (cont. var.)** | **0.998 (0.9968,0.9991)** | **< 0.001** |
| PCT (cont. var.) | 1.0065 (0.9984,1.0147) | 0.117 |
| CRP (cont. var.) | 1.0018 (0.9998,1.0039) | 0.079 |
| **Lactate (cont. var.)** | **1.09 (1.03,1.15)** | **0.002** |
| **Invasive mechanical ventilation use: Yes vs No** | **3.08 (2.36,4.01)** | **< 0.001** |
| **Vasopressor use: Yes vs No** | **4.18 (3.23,5.4)** | **< 0.001** |
